# Supplementary material for: Sporopollenin Capsules as Biomimetic Templates for the Synthesis of Hydroxyapatite and β-TCP
Source: MDPI journal article supplement (doi:10.3390/biomimetics9030159), 2024-03-04
Supplement: s1 [file s1]

## Sporopollenin capsules as biomimetic templates for the synthesis of hydroxyapatite and calcium phosphate.

Arianna De Mori, Daniel Quizon, Hannah Dalton, Berzah Yavuzyeigil, Guido Cerri, Milan Antonijevic, Marta Roldo

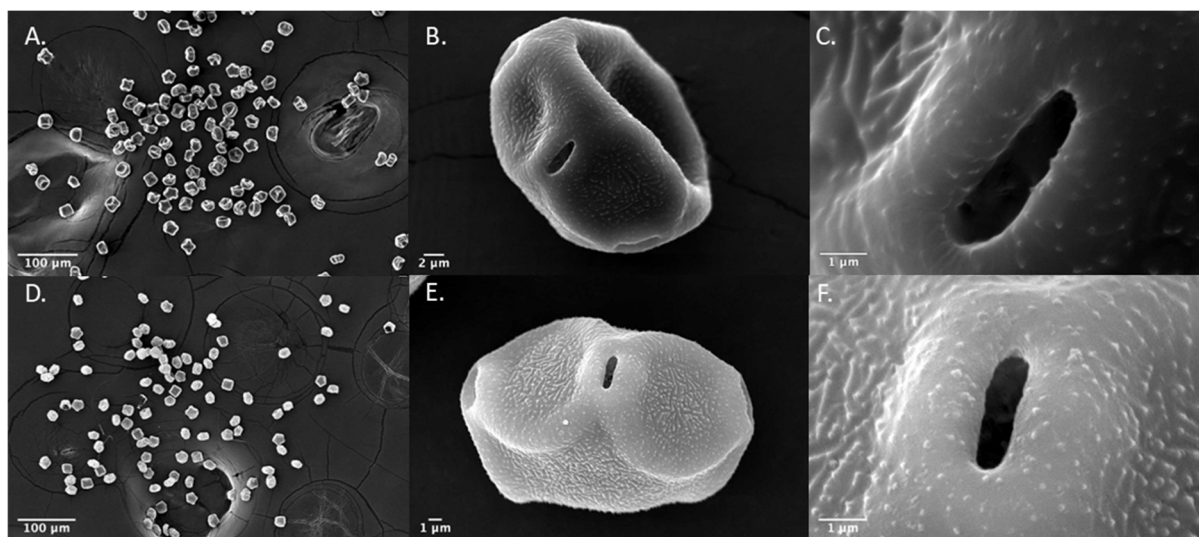

**Figure S1.** SEM images of alder pollen grains before (A-C) and after (D-F) acid washing.

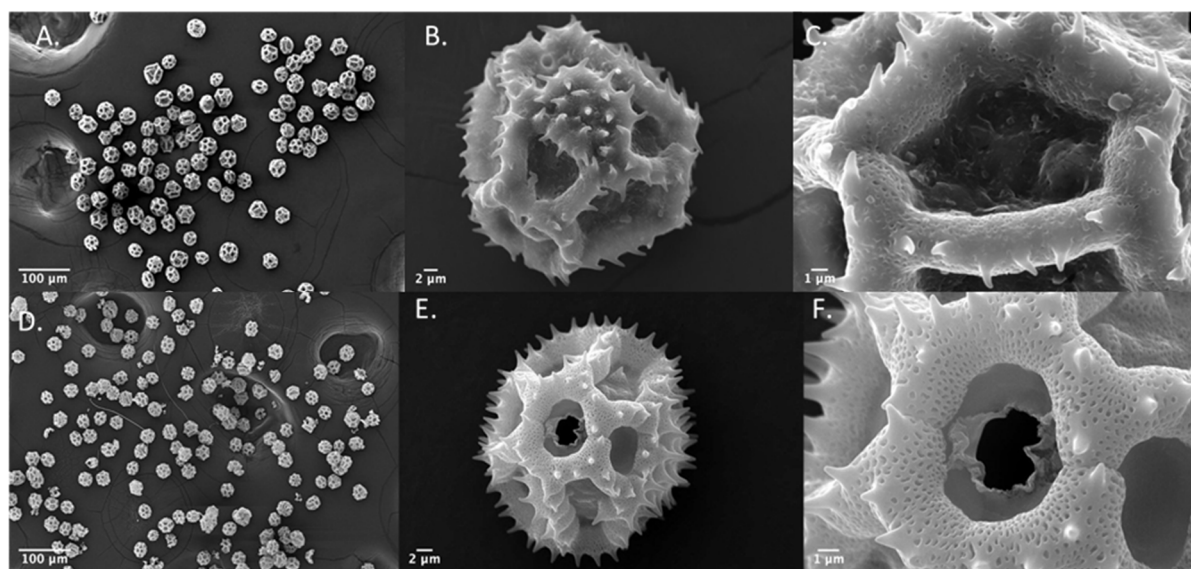

**Figure S2.** SEM images of dandelion pollen before (A-C) and after acid treatment (D-F).

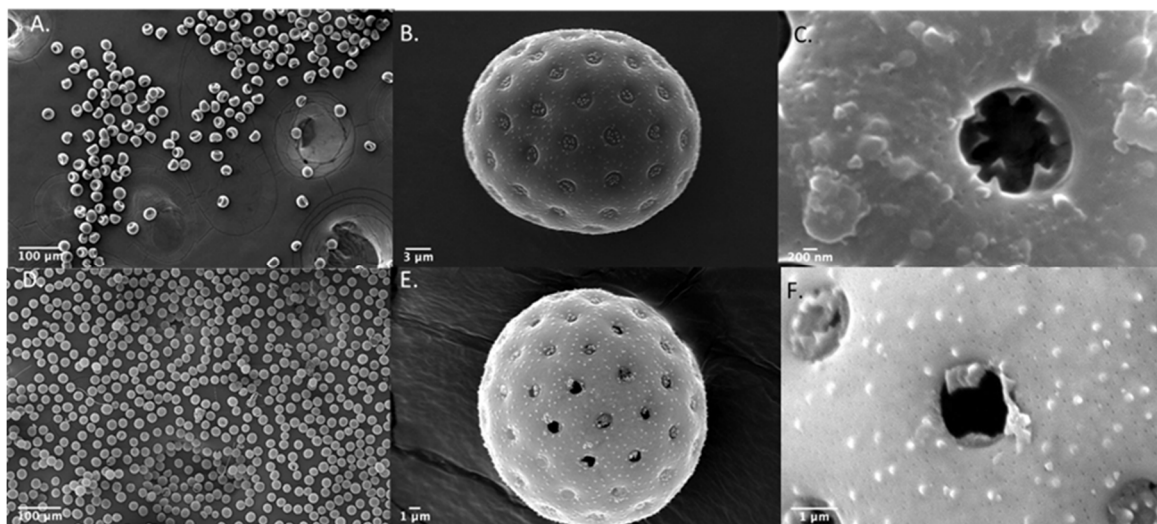

**Figure S3.** SEM images of lamb's quarters pollen before (A-C) and after acid washing (D-F).

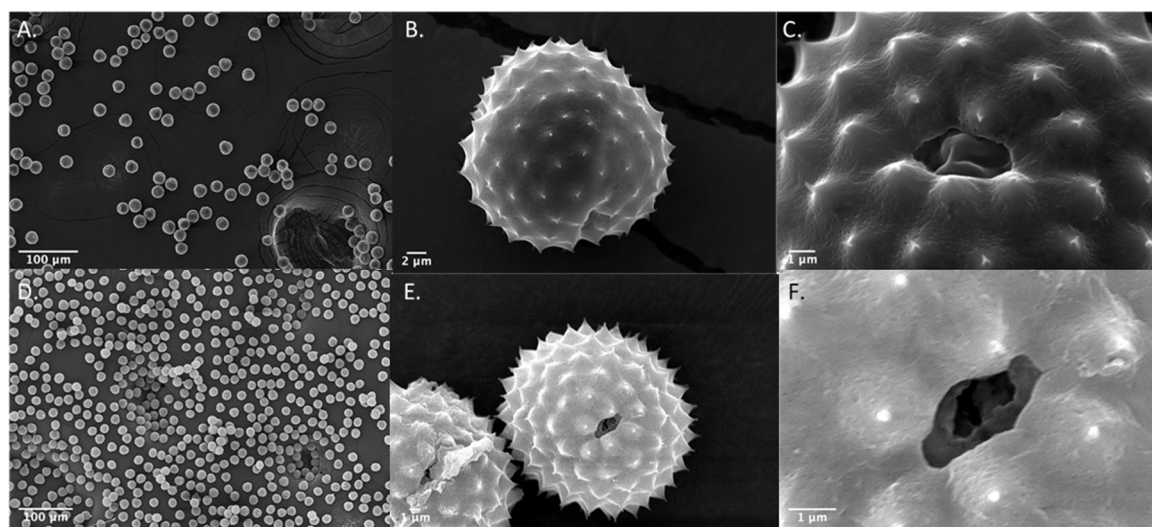

**Figure S4.** SEM photographs of ragweed pollen before (A-C) and after acid washing (D-F).

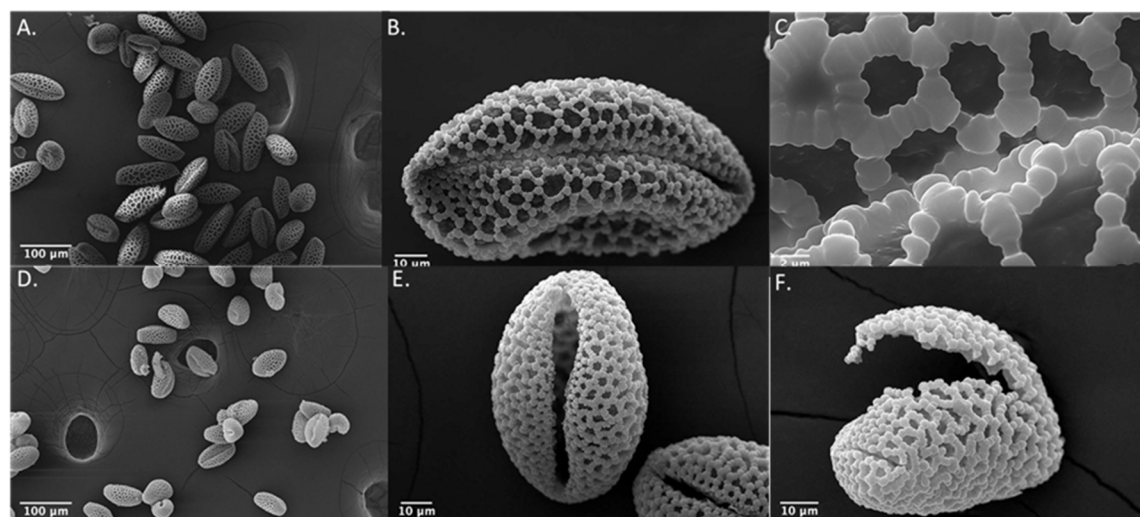

**Figure S5.** SEM photographs of stargazer lily grain before (A-C) and after (D-F) acid washing.

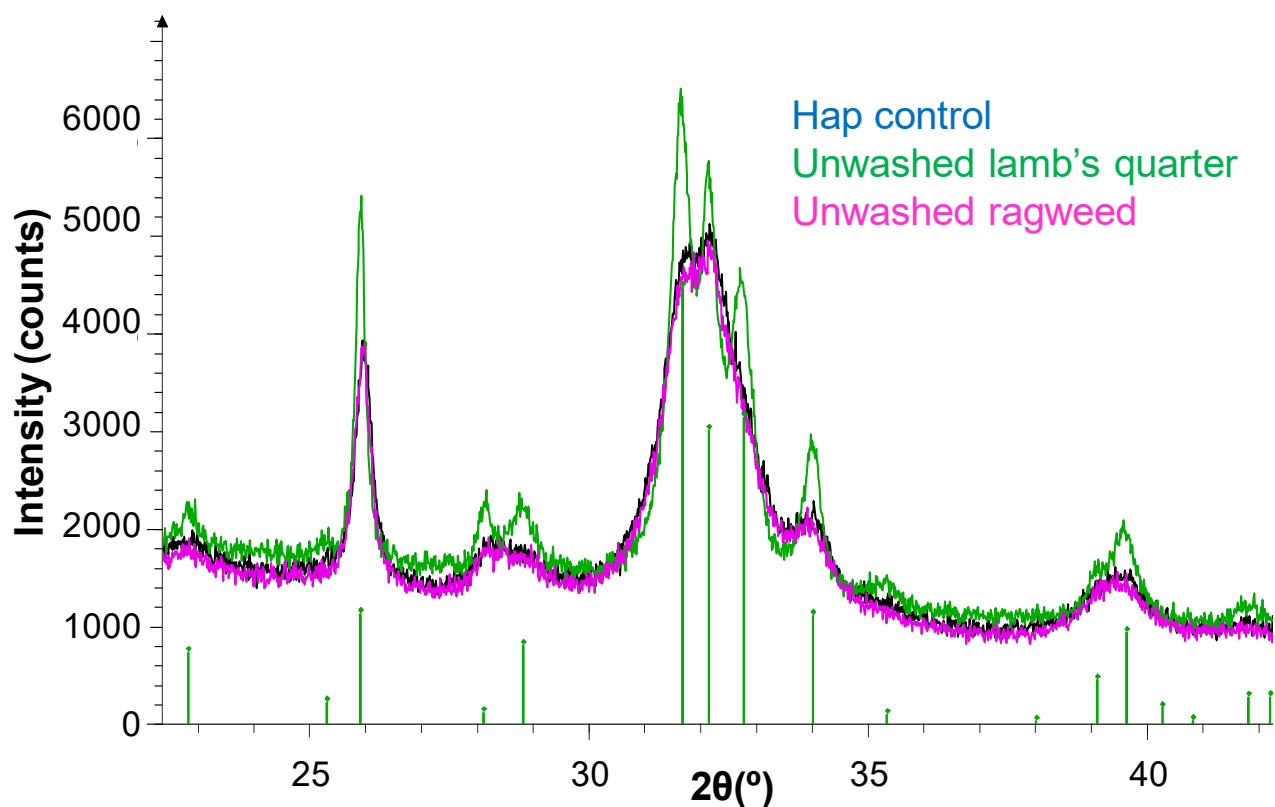

**Figure S6 A.** XRD patterns ( $2\theta$  range 22.5-42.2°) of HAp control, unwashed lamb's quarter, and unwashed ragweed. Green bars: HAp (PDF N. 72-1243).

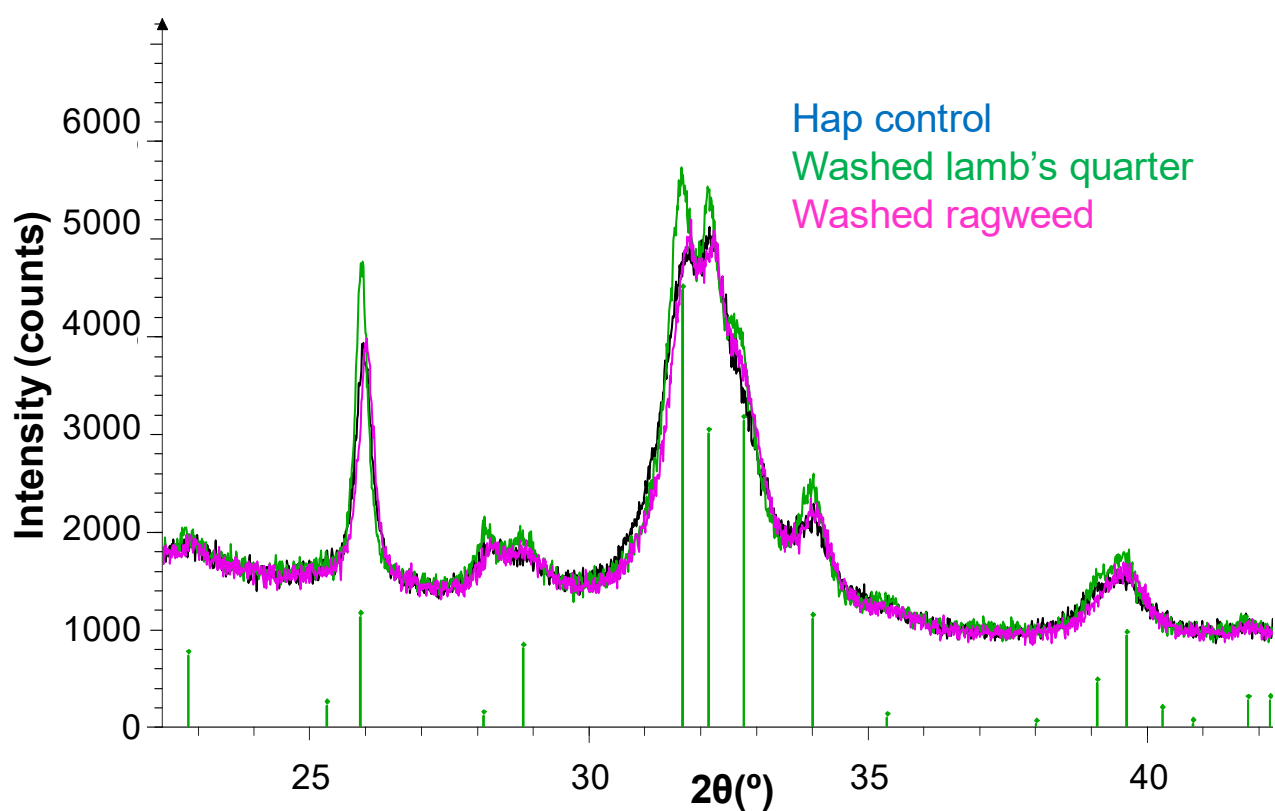

**Figure S6 B.** XRD patterns ( $2\theta$  range 22.5-42.2°) of HAp control, washed lamb's quarter, and washed ragweed. Green bars: HAp (PDF N. 72-1243).

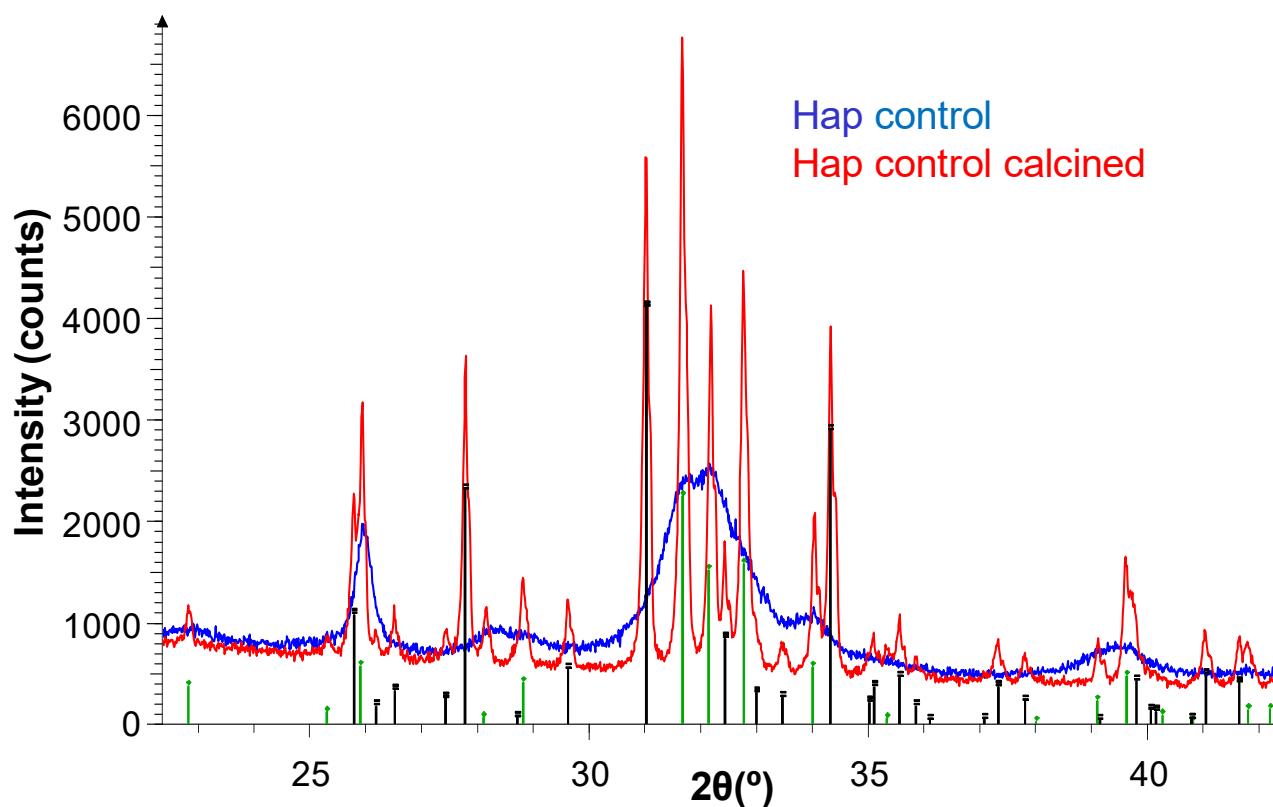

**Figure S6 C.** XRD patterns ( $2\theta$  range 22.5–42.2°) of HAp control A) before and B) after calcination. Green bars: HAp (PDF N. 72-1243). Black bars:  $\beta$ -TCP (PDF N. 70-2065).

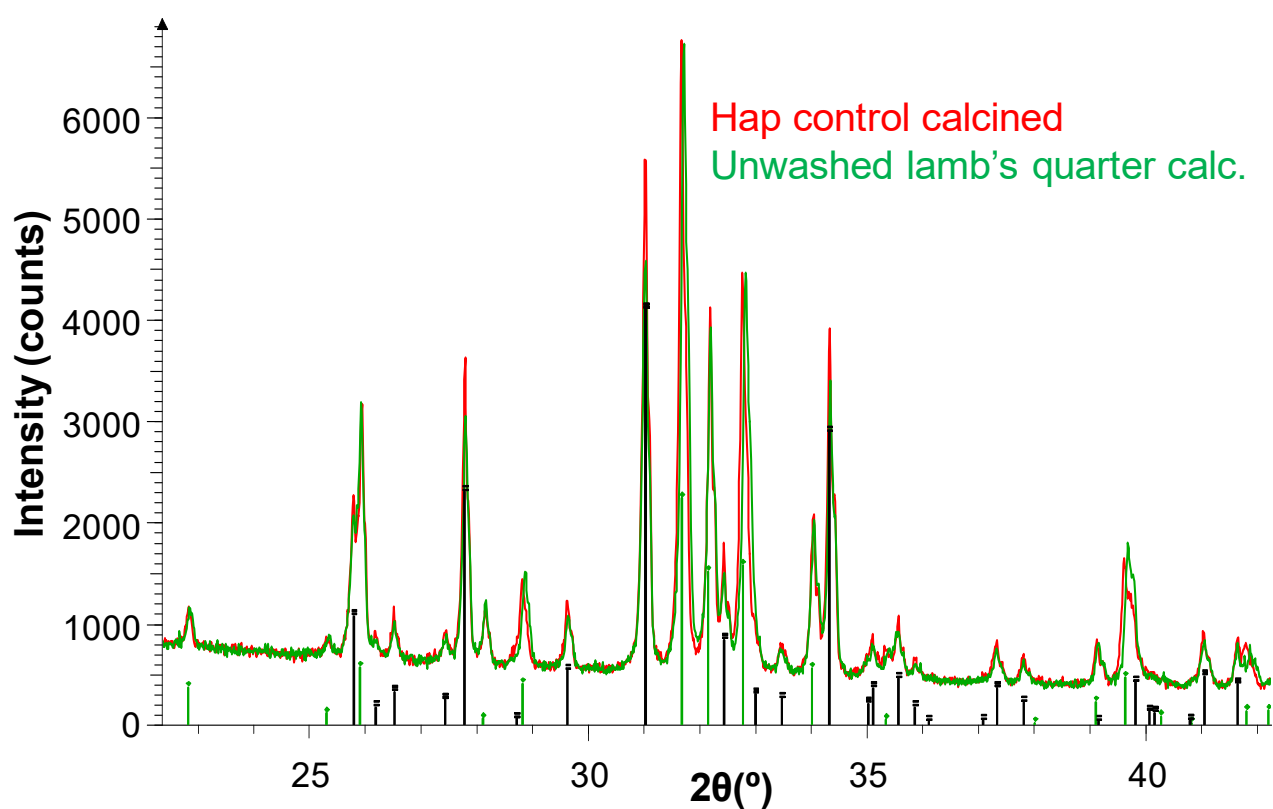

**Figure S6 D.** XRD patterns ( $2\theta$  range 22.5–42.2°) of the HAp control and unwashed lamb's quarter samples after calcination. Green bars: HAp (PDF N. 72-1243). Black bars:  $\beta$ -TCP (PDF N. 70-2065).

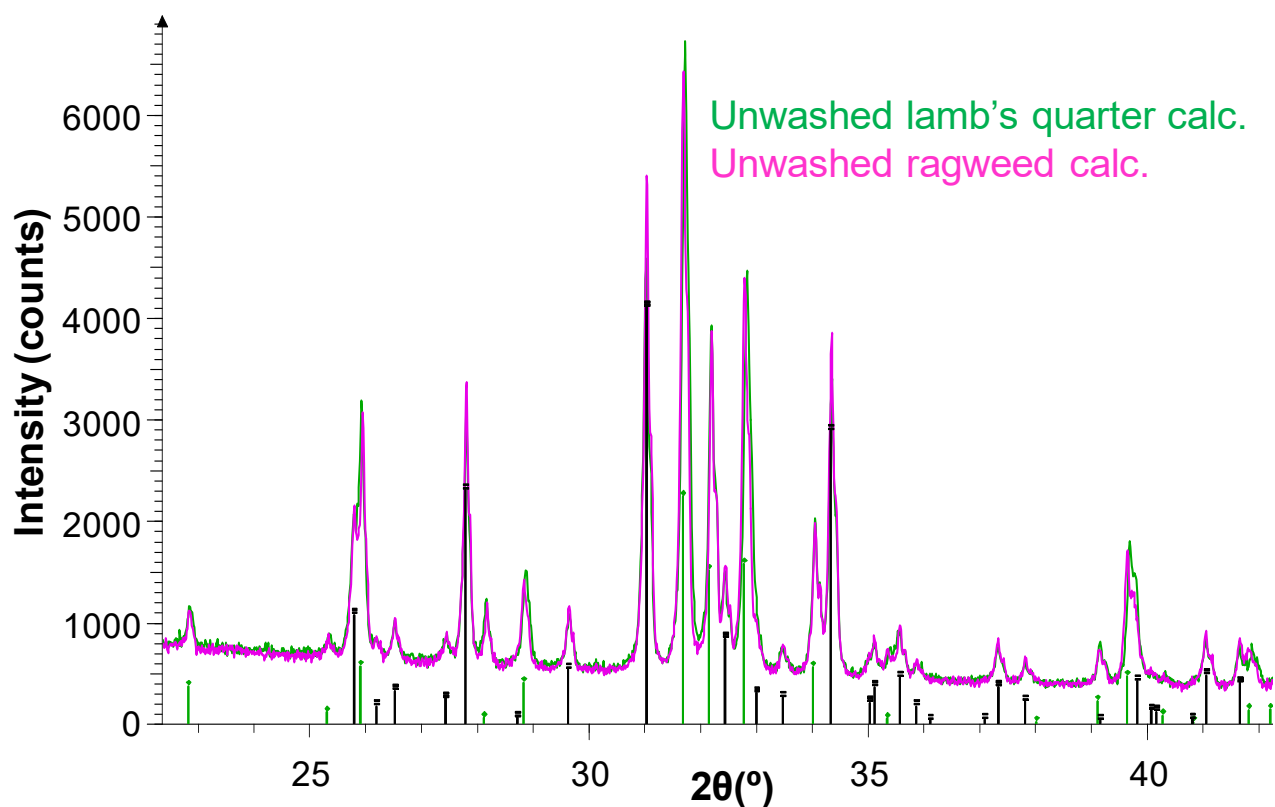

**Figure S6 E.** XRD patterns ( $2\theta$  range 22.5-42.2°) of the unwashed lamb's quarter and ragweed samples after calcination. Green bars: HAp (PDF N. 72-1243). Black bars:  $\beta$ -TCP (PDF N. 70-2065).

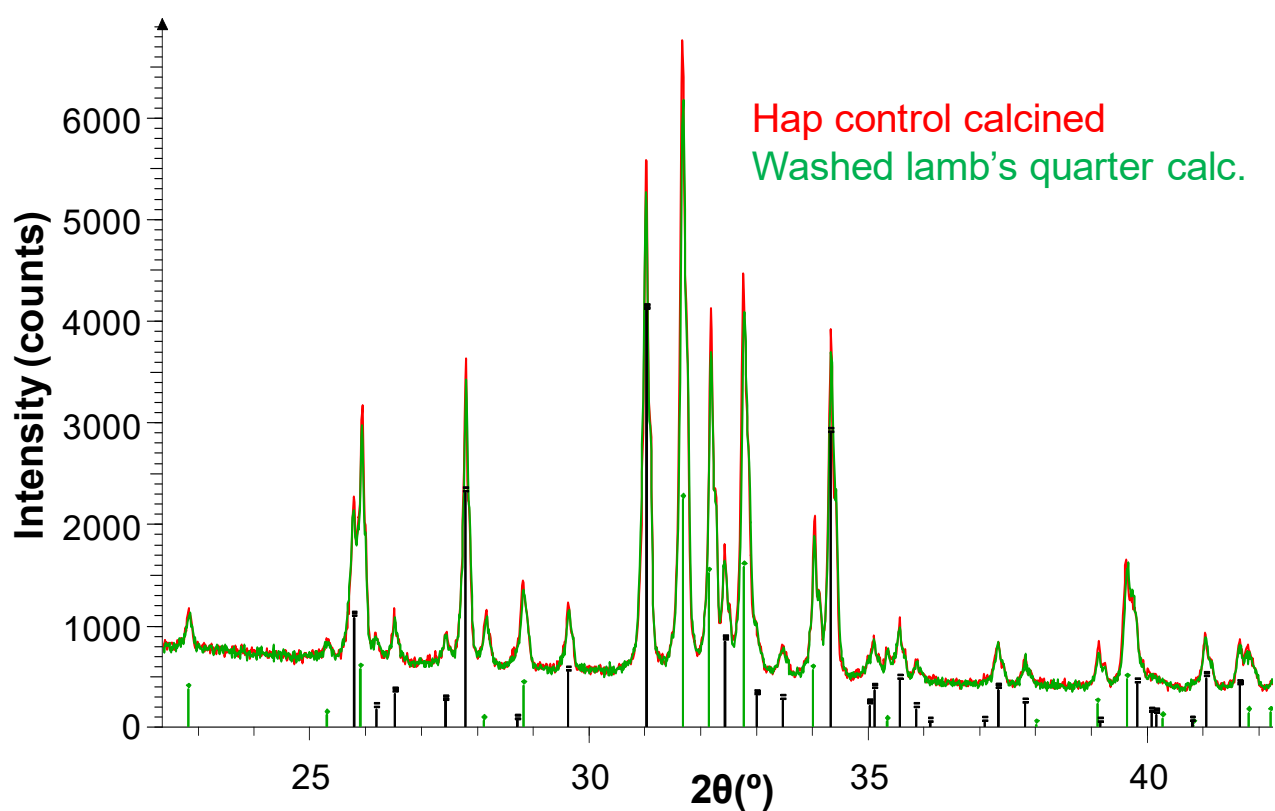

**Figure S6 F.** XRD patterns ( $2\theta$  range 22.5-42.2°) of the HAp control and washed lamb's quarter samples after calcination. Green bars: HAp (PDF N. 72-1243). Black bars:  $\beta$ -TCP (PDF N. 70-2065).

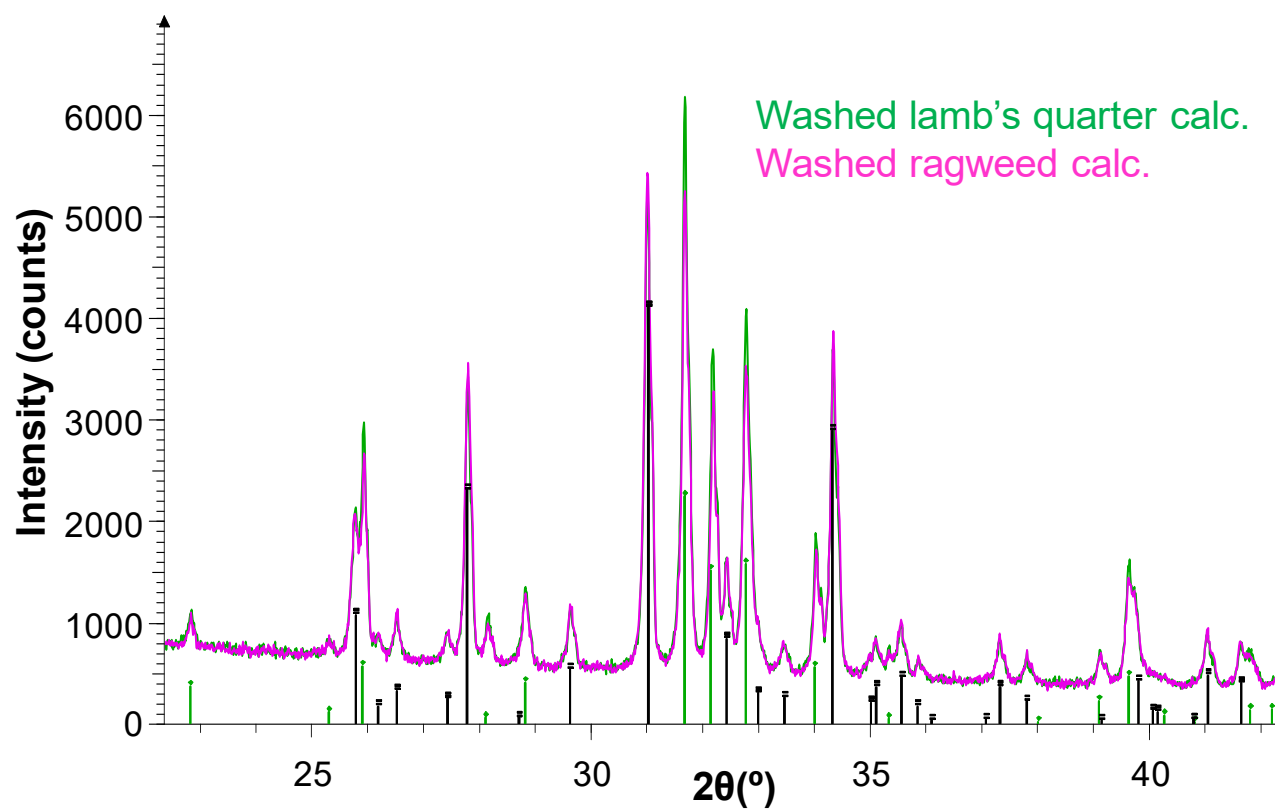

**Figure S6 G.** XRD patterns ( $2\theta$  range 22.5-42.2°) of the washed lamb's quarter and ragweed samples after calcination. Green bars: HAp (PDF N. 72-1243). Black bars:  $\beta$ -TCP (PDF N. 70-2065).
